# Supplementary material for: NET formation can occur independently of RIPK3 and MLKL signaling
Source: PubMed Central journal article supplement (PMC4738457; doi:10.1002/eji.201545615), 2015-12-02
Supplement: EJI-46-178-s001.pdf [file EJI-46-178-s001.pdf]

# European Journal of Immunology

**Supporting Information  
for**

**DOI 10.1002/eji.201545615**

Poorya Amini, Darko Stojkov, Xiaoliang Wang, Simone Wicki, Thomas Kaufmann,  
Wendy Wei-Lynn Wong, Hans-Uwe Simon and Shida Yousefi

**NET formation can occur independently of RIPK3  
and MLKL signaling**

## **Supporting Information**

### **NET formation can occur independently of RIPK3 and MLKL signaling**

***Poorya Amini<sup>1</sup>, Darko Stojkov<sup>1</sup>, Xiaoliang Wang<sup>1</sup>, Simone Wicki<sup>1</sup>, Thomas Kaufmann<sup>1</sup>, Wendy Wei-Lynn Wong<sup>2</sup>, Hans-Uwe Simon<sup>1</sup>, and Shida Yousefi<sup>1</sup>***

<sup>1</sup>Institute of Pharmacology, University of Bern, Bern, Switzerland

<sup>2</sup>Institute of Experimental Immunology, University of Zurich, Zurich, Switzerland

# Supporting Information Figure 1

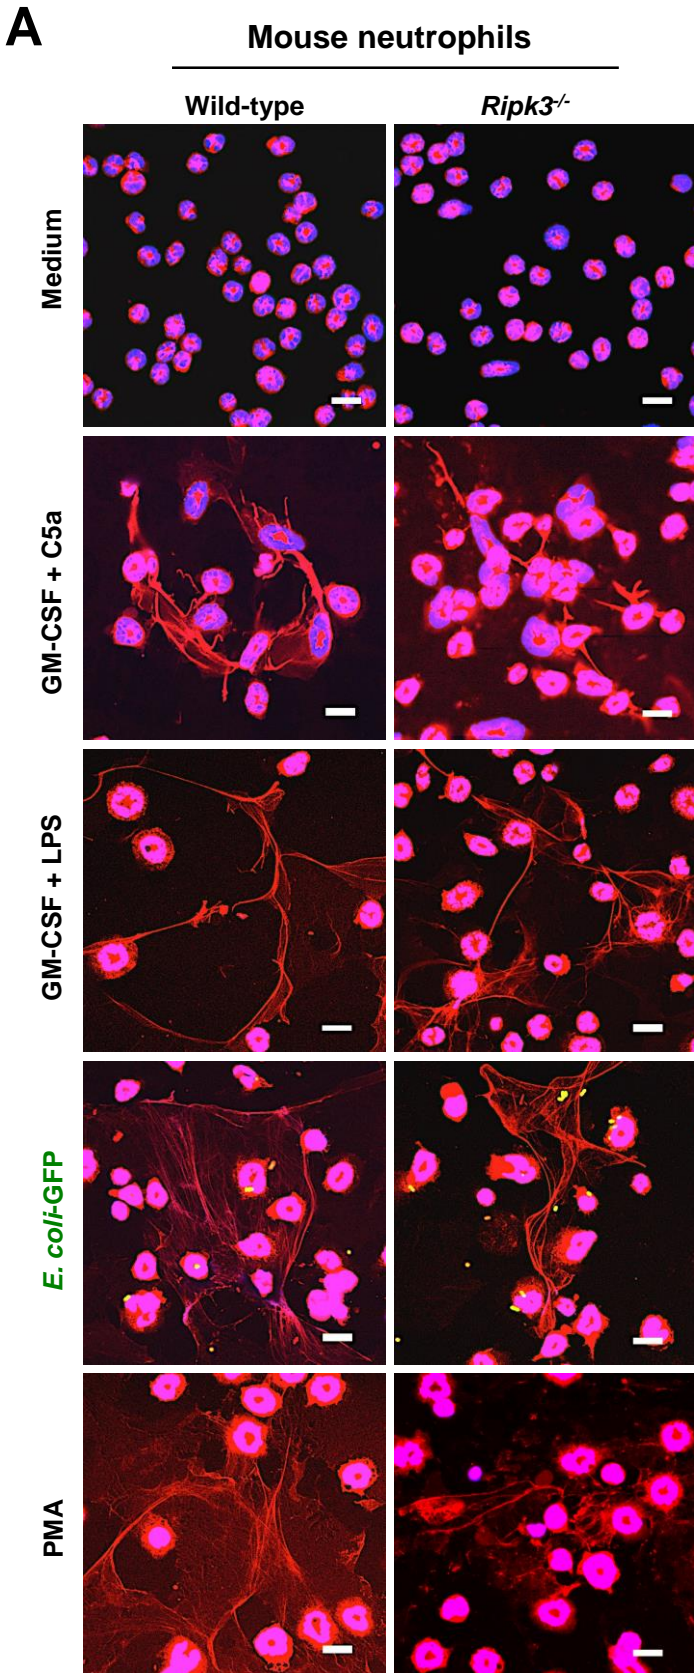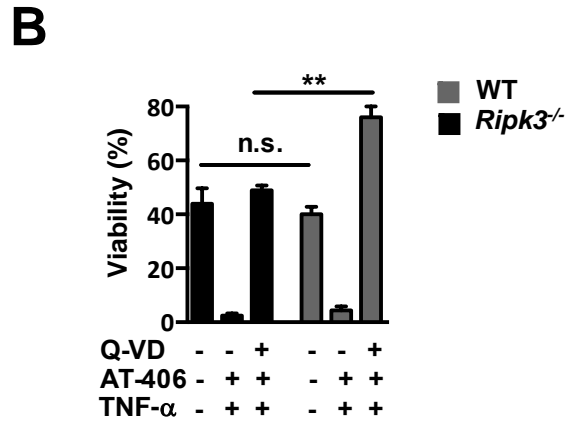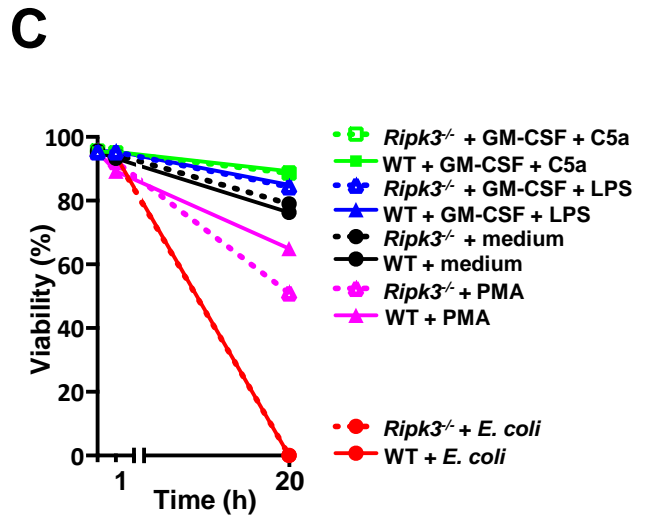

MitoSOX  
Hoechst 33342

**Supporting Information Figure 1. Activated mouse *RIPK3*-deficient neutrophils can release DNA in the absence of cell death.**

Confocal microscopy. NET formation following short-term stimulation (total 45 min) of mouse neutrophils with the indicated triggers. No difference was observed between wild-type and *Ripk3*-deficient cells. Representative images of three independent experiments are shown. Bars, 10  $\mu$ m. The number of DNA-releasing neutrophils was determined in ten high power fields (Fig. 1B and Supporting Information Movie 1). (B) Flow cytometry. Mouse neutrophils were incubated in presence or absence of 1  $\mu$ M Smac mimetic AT-406 and 20  $\mu$ M Q-VD for 30 min, before 100 ng/ml mouse TNF- $\alpha$  stimulation. Cell viability is shown after 48 h (n=3). The difference between AT-406 and Q-VD pre-treated wild-type and *Ripk3*-deficient neutrophils following TNF- $\alpha$  stimulation represents the percentage necroptotic cells seen in wild-type neutrophils only. \*\*, p<0.01. (C) Flow cytometry. Wild-type and *Ripk3*-deficient neutrophils were stimulated as indicated. Cell viability was measured after 1 and 20 h (n=3). No significant cell death is induced within 1 h, independent of the NET-forming trigger including 25 nM PMA.

# Supporting Information Movie 1

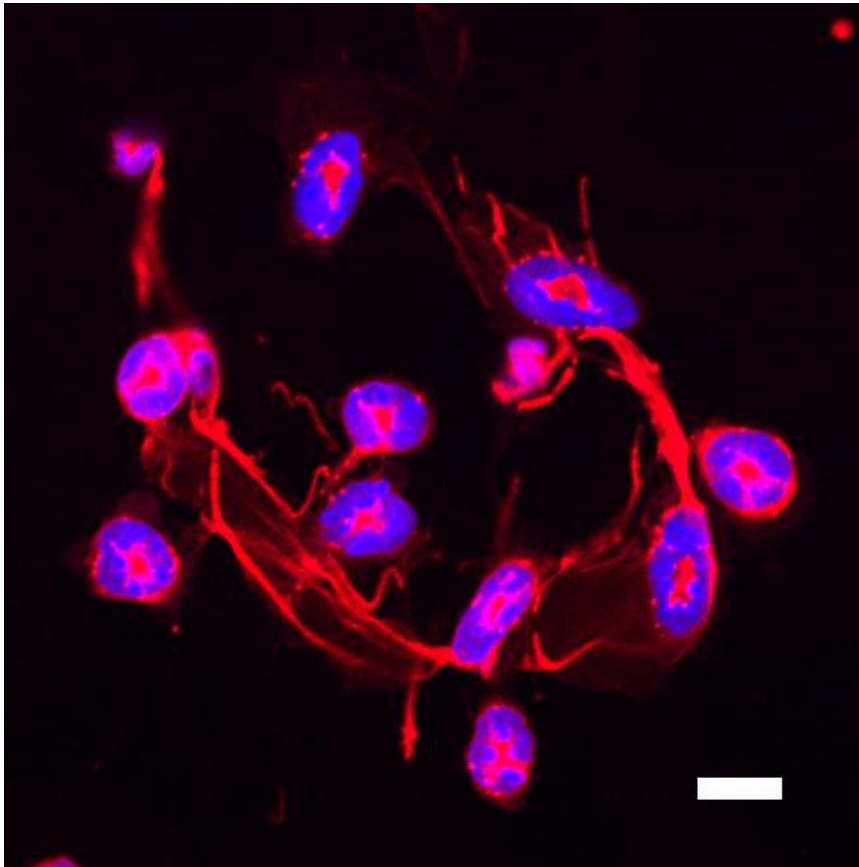

MitoSOX  
Hoechst 33342

Mouse neutrophils: GM-CSF + C5a

## **GM-CSF-primed and C5a-activated mouse neutrophils release DNA in the absence of cell death.**

Mouse neutrophils seeded on glass coverslips were incubated with GM-CSF for 20 min and subsequently activated with C5a for 15 min. In the last 5 min of the stimulation period, cells were labeled with 5 mM MitoSOX Red to stain the extracellular DNA. Cells were then fixed with 4% paraformaldehyde and the nucleus stained with 1  $\mu$ M Hoechst 33342. The image was acquired by LSM 700 (Carl Zeiss Micro Imaging, Jena, Germany) using an 63x /1.40 Oil DIC objective with an interval of 0.1  $\mu$ m, slices taken throughout the z-axis (z stacks) with 27 slices per stack in order to show extracellular DNA in its full extension. Bar, 10  $\mu$ m.

## Supporting Information Figure 2

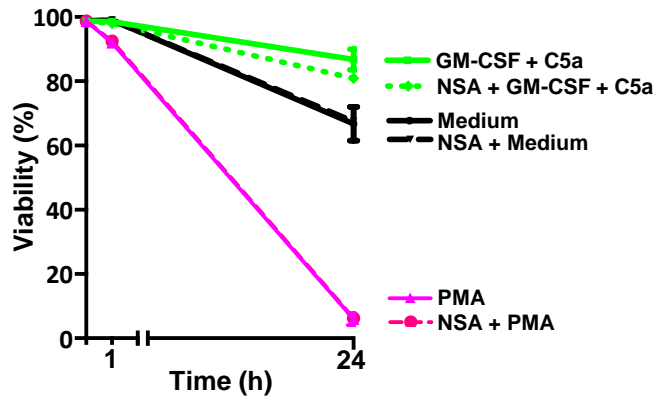

### Supporting Information Figure 2. Human neutrophils do not exhibit cell death in association with DNA trap formation.

Flow cytometry. Control and NSA-treated human neutrophils were stimulated as indicated. Cell viability was measured after 1 and 24 h (n=3). No significant cell death is induced within 1 h, independent of the NET-forming trigger including 25 nM PMA.
